# Supplementary material for: Assessing the environmental and social co-benefits and disbenefits of natural risk management measures
Source: PubMed Central journal article supplement — Heliyon. 2022 Dec 19;8(12):e12465. doi: 10.1016/j.heliyon.2022.e12465 (PMC9801133; doi:10.1016/j.heliyon.2022.e12465), 2022-12-19
Supplement: mmc1.pdf [file mmc1.pdf]

# Assessing the environmental and social co-benefits and disbenefits of natural risk management measures

Corinne Curt <sup>a,d</sup>, Pascal Di Maiolo <sup>a,d</sup>, Alexandra Schleyer-Lindenmann <sup>b,d</sup>, Anne Tricot <sup>b,d</sup>, Aurélie Arnaud <sup>c,d</sup>, Thomas Curt <sup>a,d</sup>, Nelly Parès <sup>b,d</sup>, Franck Taillandier <sup>a,d</sup>

<sup>a</sup> INRAE, Aix-Marseille Université – UMR RECOVER – 3275, Route de Cézanne – CS 40061 – 13100 Aix en Provence CEDEX 5 – France – [corinne.curt@inrae.fr](mailto:corinne.curt@inrae.fr)

<sup>b</sup> ESPACE, UMR 7300, CNRS, Aix Marseille Université, Avignon Université, Université Côte d'Azur, 84000 Avignon – France

<sup>c</sup> LIEU-IUAR – 2 av. Henri Poncet – 13090 Aix-en-Provence – France

<sup>d</sup> ECCOREV FR 3098 – Technopôle de l'Environnement Arbois Méditerranée – Bât. LAENNEC – Avenue Louis Philibert – 13545 Aix-en-Provence Cedex 04– France

## Appendix A – Literature analysis

### A1- Articles dealing with the assessment of multifunctionality, co-benefits in the risk management domain

A literature analysis was carried out of the Web of Science (<https://www.webofknowledge.com>) and the SCOPUS databases (<https://www.elsevier.com/solutions/scopus>) in October 2022. The requests were:

- Search in the title, abstract and keywords: (multifunctionality OR multi-functionality OR co-benefit) AND “risk management”;
- Search in the title: sustain\* AND “risk management” (we limited the search to the title as search in the title, abstract and keywords led to 8 240 articles);
- (TI =("nature-based solution" OR "sustainable urban drainage system" OR NBS OR SUDS) AND ALL= "assess\*").

Journal articles in English were considered. Duplicates were removed after which finer analyses were performed on abstracts and full reviews. Articles related to other domains such as ecology, agriculture, medicine, supply chain were removed. Finally, we analyzed 116 articles. Among, them, 19 propose a method for assessing co-benefits or dis-benefits. We also added the recent EU report dealing with the assessment of the social, environmental and economic impacts of NBS.

### A2- Inventory of GS, HS and NBS

We used several sources for this research: the institutional literature, the scientific literature (search in SCOPUS and Web of Science), and technical reports. Keywords used were: Flood, Wildfire, Coastal Flood, Risk Management, NBS, Infrastructure (French terms were also used – search on the Internet). Documents selected were:

***Institutional literature:*** (Global Water Partnership, 2000; Joint Steering Committee for Water Sensitive Cities, 2009; UNESCO, 2009; World Meteorological Organization, 2006; World Meteorological Organization, 2009; World Meteorological Organization, 2012; World

Meteorological Organization, 2013; World Meteorological Organization, 2017; World Wildlife Fund (WWF), 2016; WWAP/ONU-Eau, 2018; European et al., 2015).

**Scientific literature in English:** (Estrella and Saalismaa, 2013; Cohen-Shacham et al., 2016; Alves et al., 2019; Alves et al., 2018a; Alves et al., 2018b; Aly et al., 2022; Andersson-Sköld and Nyberg, 2016; Bana e Costa et al., 2004; Banihabib et al., 2019; Beceiro et al., 2022; Bezak et al., 2021; Biswal et al., 2022; Borsje et al., 2011; Brouwer and van Ek, 2004; Carsel et al., 1988; Chan et al., 2022; Curt and Gervais, 2014; Curt and Talon, 2013; Curt and Frejaville, 2018; Curt et al., 2016; Davis et al., 2009; Day Jr et al., 1997; Dittrich et al., 2019; Edjossan-Sossou et al., 2014; Edjossan-Sossou et al., 2020; Eggermont et al., 2015; Faivre et al., 2017; Faivre et al., 2018; Ferrans et al., 2022; Folk, 1966; Ganteaume et al., 2013; Giordano et al., 2020; Gourlay, 1992; Haque et al., 2022; Hoang et al., 2018; Johnson and Geisendorf, 2019; Kumar et al., 2021; Lähde et al., 2019; McVittie et al., 2018; Möller, 2006; Nikolaidis et al., 2017; O'Donnell et al., 2020; Ossa-Moreno et al., 2017; Qi et al., 2020; Stephan et al., 2017; Teal and Weishar, 2005; Titko and Ristvej, 2020; Turkelboom et al., 2021; van Veelen et al., 2015; Vercruysse et al., 2019; Vincent et al., 2017; Viti et al., 2022; Wendling et al., 2018; Wójcik-Madej and Sowińska-Świerkosz, 2022; Yang and Zhang, 2021; Sayers et al., 2013).

**Scientific literature in French:** (Beer et al., 2003; Benard and Peruiset, 2010; Dupraz et al., 2014; Binggeli, 1997; Bouisset, 2011; Bourgogne, 2009; Chevillot-Miot and Mercier, 2014; Darly, 2014; Ernwein and Salomon-Cavin, 2014; Etienne, 1996; Étienne, 2001; Fernandes, 2010; Hellequin et al., 2013; Henine et al., 2012; Jorda and Lippmann-Provansal, 1990; Labadie and Chastel, 1994; Letortu et al., 2012; Morandini, 1979; NODIN et al., 2009; Poulard et al., 2008; Roose, 1996; Valette et al., 1993; Vanroye and Auffret, 2010; Vélez, 1990; Vidal and Fleury, 2009a; Vidal and Fleury, 2009b; Vinet et al., 2012; Mangiavillano, 2008; Peuziat, 2005; Samat, 2007).

**Technical reports (French and English):** (Bridges et al., 2021; Castelli, 2003; CIRIA, 2013; Cousin, 2011; European Commission, 2021; Global Water Partnership, 2000; Joint Steering Committee for Water Sensitive Cities, 2009; UNESCO, 2009; Vanroye and Auffret, 2010; World Meteorological Organization, 2006; World Meteorological Organization, 2009; World Meteorological Organization, 2012; World Meteorological Organization, 2013; World Meteorological Organization, 2017; World Wildlife Fund (WWF), 2016; WWAP/ONU-Eau, 2018; CETE Méditerranée, 2010; 2008).

**Thesis and Books (French and English):** (Nédélec, 1999; Poletti, 2014; Valdieu and Outrequin, 2009; Mangiavillano, 2008; Peuziat, 2005; Samat, 2007).

## References

2008. Construire durable. *Le Moniteur, Hors-série*. Le Moniteur, Hors-série.
- ALVES, A., GERSONIUS, B., KAPELAN, Z., VOJINOVIC, Z. & SANCHEZ, A. 2019. Assessing the Co-Benefits of green-blue-grey infrastructure for sustainable urban flood risk management. *J Environ Manage*, 239, 244-254, 10.1016/j.jenvman.2019.03.036.
- ALVES, A., GERSONIUS, B., SANCHEZ, A., VOJINOVIC, Z. & KAPELAN, Z. 2018a. Multi-criteria Approach for Selection of Green and Grey Infrastructure to Reduce Flood Risk and Increase CO-benefits. *Water Resources Management*, 32, 2505-2522, 10.1007/s11269-018-1943-3.
- ALVES, A., PATIÑO GÓMEZ, J., VOJINOVIC, Z., SÁNCHEZ, A. & WEESAKUL, S. 2018b. Combining Co-Benefits and Stakeholders Perceptions into Green Infrastructure Selection for Flood Risk Reduction. *Environments*, 5, 29, 10.3390/environments5020029.

- ALY, M. M., REFAY, N. H., ELATTAR, H., MORSY, K. M., BANDALA, E. R., ZEIN, S. A. & MOSTAFA, M. K. 2022. Ecohydrology and flood risk management under climate vulnerability in relation to the sustainable development goals (SDGs): a case study in Nagaa Mobarak Village, Egypt. *Natural Hazards*, 112, 1107-1135, 10.1007/s11069-022-05220-2.
- ANDERSSON-SKÖLD, Y. & NYBERG, L. 2016. Effective and Sustainable Flood and Landslide Risk Reduction Measures: An Investigation of Two Assessment Frameworks. *International Journal of Disaster Risk Science*, 7, 374-392, 10.1007/s13753-016-0106-5.
- BANA E COSTA, C. A., ANTÃO DA SILVA, P. & NUNES CORREIA, F. 2004. Multicriteria Evaluation of Flood Control Measures: The Case of Ribeira do Livramento. *Water Resources Management*, 18, 263-283, 10.1023/B:WARM.0000043163.19531.6a.
- BANIHABIB, M. E., CHITSAZ, N. & RANDHIR, T. O. 2019. Non-compensatory decision model for incorporating the sustainable development criteria in flood risk management plans. *SN Applied Sciences*, 2, 6, 10.1007/s42452-019-1695-6.
- BECEIRO, P., BRITO, R. S. & GALVÃO, A. 2022. Assessment of the contribution of Nature-Based Solutions (NBS) to urban resilience: application to the case study of Porto. *Ecological Engineering*, 175, 106489, <https://doi.org/10.1016/j.ecoleng.2021.106489>.
- BEER, J., HARVEY, C., IBRAHIM, M., HARMAND, J.-M., SOMARRIBA, E. & JIMENEZ, F. Fonctions de service des systèmes agroforestiers. Actes du XIIe Congrès forestier mondial : La forêt, source de vie. Des forêts pour la planète, 21-28/09/2003 Québec, Canada. Bibliothèque Nationale du Québec.
- BENARD, M. & PERUISSET, G. Gestion intégrée pour la reconquête des espaces urbains. Novatech 2010-7ème Conférence sur les techniques et stratégies durables pour la gestion des eaux urbaines par temps de pluie/7th International Conference on sustainable techniques and strategies for urban water management, 2010. GRAIE, Lyon, France.
- BEZAK, N., KOVAČEVIĆ, M., JOHNNEN, G., LEBAR, K., ZUPANC, V., VIDMAR, A. & RUSJAN, S. 2021. Exploring Options for Flood Risk Management with Special Focus on Retention Reservoirs. *Sustainability*, 13, 10099.
- BINGGELI, F. 1997. Dix ans de brûlage dirigé dans les forêts du Massif des Maures. *Forêt méditerranéenne*, 18, 311-317.
- BISWAL, B. K., BOLAN, N., ZHU, Y.-G. & BALASUBRAMANIAN, R. 2022. Nature-based Systems (NbS) for mitigation of stormwater and air pollution in urban areas: A review. *Resources, Conservation and Recycling*, 186, 106578, <https://doi.org/10.1016/j.resconrec.2022.106578>.
- BORSJE, B. W., VAN WESENBEECK, B. K., DEKKER, F., PAALVAST, P., BOUMA, T. J., VAN KATWIJK, M. M. & DE VRIES, M. B. 2011. How ecological engineering can serve in coastal protection. *Ecological Engineering*, 37, 113-122.
- BOUISSET, C. 2011. PPR, urbanisation et risques d'incendie de forêt dans les Pyrénées-Orientales: méthodes, enjeux, débats. *Cybergeo: European Journal of Geography*.
- BOURGOGNE, P. 2009. Les techniques alternatives sur la communauté urbaine de Bordeaux-25 ans de retour d'expérience. *Techniques Sciences Méthodes*, 62-68.
- BRIDGES, T. S., KING, J. K., SIMM, J. D., BECK, M. W., COLLINS, G., LODDER, Q. & MOHAN, R. K. 2021. International Guidelines on Natural and Nature-Based Features for Flood Risk Management. Vicksburg, MS: U.S. Army Engineer Research and Development Center.
- BROUWER, R. & VAN EK, R. 2004. Integrated ecological, economic and social impact assessment of alternative flood control policies in the Netherlands. *Ecological Economics*, 50, 1-21, <https://doi.org/10.1016/j.ecolecon.2004.01.020>.
- CARSEL, R. F., PARRISH, R. S., JONES, R. L., HANSE, J. L. & LAMB, R. L. 1988. Characterizing the uncertainty of pesticide leaching in agricultural soils. *Journal of Contaminant Hydrology*, 2, 111-124.
- CASTELLI, L. 2003. Le débroussaillage: recommandations techniques à l'interface habitat forêt.
- CETE MÉDITERRANÉE 2010. Evaluation des coûts de protection des territoires littoraux en Languedoc-Roussillon. Rapport d'étude pour la DREAL Languedoc-Roussillon. In: CEREMA (ed.).

- CHAN, F. K. S., YANG, L. E., MITCHELL, G., WRIGHT, N., GUAN, M., LU, X., WANG, Z., MONTZ, B. & ADEKOLA, O. 2022. Comparison of sustainable flood risk management by four countries – the United Kingdom, the Netherlands, the United States, and Japan – and the implications for Asian coastal megacities. *Nat. Hazards Earth Syst. Sci.*, 22, 2567-2588, 10.5194/nhess-22-2567-2022.
- CHEVILLOT-MIOT, E. & MERCIER, D. 2014. La vulnérabilité face au risque de submersion marine: exposition et sensibilité des communes littorales de la région Pays de la Loire (France). *VertigO-la revue électronique en sciences de l'environnement*, 14.
- CIRIA, M. 2013. USACE. The International Levee Handbook. C731. CIRIA: London, UK.
- COHEN-SHACHAM, E., JANZEN, C., MAGINNIS, S. & WALTERS, G. (eds.) 2016. *Nature-based solutions to address global societal challenges* Gland, Switzerland: IUCN.
- COUSIN, A. 2011. Propositions pour une stratégie nationale de gestion du trait de côte, du recul stratégique et de la défense contre la mer, partagée entre l'État et les collectivités territoriales. Paris: La Documentation française, ministère de l'Écologie, du Développement durable, des Transports et du Logement.
- CURT, C. & GERVAIS, R. 2014. Approach to improving the quality of data used to analyse dams– Illustrations by two methods. *European journal of environmental and civil engineering*, 18, 87-105.
- CURT, C. & TALON, A. 2013. Assessment and control of the quality of data used during dam reviews by using expert knowledge and the ELECTRE TRI method. *Journal of computing in civil engineering*, 27, 10-17.
- CURT, T. & FREJAVILLE, T. 2018. Wildfire policy in Mediterranean France: how far is it efficient and sustainable? *Risk analysis*, 38, 472-488.
- CURT, T., FRÉJAVILLE, T. & LAHAYE, S. 2016. Modelling the spatial patterns of ignition causes and fire regime features in southern France: implications for fire prevention policy. *International Journal of Wildland Fire*, 25, 785-796.
- DARLY, S. 2014. Des moutons dans la ville: quelles externalités environnementales des pratiques d'élevage ovin en milieu urbain? *CAIRN*, 224, 285-290.
- DAVIS, A. P., HUNT, W. F., TRAVER, R. G. & CLAR, M. 2009. Bioretention technology: Overview of current practice and future needs. *Journal of environmental engineering*, 135, 109-117.
- DAY JR, J. W., MARTIN, J. F., CARDOCH, L. & TEMPLET, P. H. 1997. System functioning as a basis for sustainable management of deltaic ecosystems. *Coastal Management*, 25, 115-153.
- DITTRICH, R., BALL, T., WREFORD, A., MORAN, D. & SPRAY, C. J. 2019. A cost-benefit analysis of afforestation as a climate change adaptation measure to reduce flood risk. *Journal of Flood Risk Management*, 12, e12482, <https://doi.org/10.1111/jfr3.12482>.
- DUPRAZ, C., LIAGRE, F., CANET, A. & SIRVEN, B. Adoption des pratiques agroforestières en France, quelles perspectives? CIAG Carrefour de l'Innovation Agronomique, 2014. INRA, np.
- EDJOSSAN-SOSSOU, A. M., DECK, O., AL HEIB, M. & VERDEL, T. 2014. A decision-support methodology for assessing the sustainability of natural risk management strategies in urban areas. *Natural Hazards and Earth System Sciences*, 14, 3207-3230, 10.5194/nhess-14-3207-2014.
- EDJOSSAN-SOSSOU, A. M., GALVEZ, D., DECK, O., AL HEIB, M., VERDEL, T., DUPONT, L., CHERY, O., CAMARGO, M. & MOREL, L. 2020. Sustainable risk management strategy selection using a fuzzy multi-criteria decision approach. *International Journal of Disaster Risk Reduction*, 45, 10.1016/j.ijdrr.2020.101474.
- EGGERMONT, H., BALIAN, E., AZEVEDO, J., BEUMER, V., BRODIN, T., CLAUDET, J., FADY, B., GRUBE, M., KEUNE, H. & LAMARQUE, P. 2015. Nature-based solutions: new influence for environmental management and research in Europe. *GAIA - Ecological Perspectives on Science and Society*, 24.
- ERNWEIN, M. & SALOMON-CAVIN, J. 2014. Au-delà de l'agriculturation de la ville: l'agriculture peut-elle être un outil d'aménagement urbain? Discussion à partir de l'exemple genevois. *Géocarrefour*, 89, 31-40.

- ESTRELLA, M. & SAALISMAA, N. 2013. Ecosystem-based disaster risk reduction (Eco-DRR): an overview. In: G. RENAUD, K. S.-R., M. ESTRELLA (ed.) *The Role of Ecosystems in Disaster Risk Reduction*. United Nations University Press.
- ETIENNE, M. 1996. Intégrer des activités pastorales et fourragères aux espaces forestiers méditerranéens pour les rendre moins combustibles. *Etudes et Recherches sur les Systèmes Agraires et le Développement*, 169-182.
- ÉTIENNE, M. 2001. Aménagement de la forêt méditerranéenne contre les incendies et biodiversité. *Revue forestière française*, 53, 149-155.
- EUROPEAN, C., DIRECTORATE-GENERAL FOR, R. & INNOVATION 2015. *Towards an EU research and innovation policy agenda for nature-based solutions & re-naturing cities : final report of the Horizon 2020 expert group on 'Nature-based solutions and re-naturing cities' : (full version)*, Publications Office.
- EUROPEAN COMMISSION 2021. Evaluating the impact of nature-based solutions.
- FAIVRE, N., FRITZ, M., FREITAS, T., DE BOISSEZON, B. & VANDEWOESTIJNE, S. 2017. Nature-Based Solutions in the EU: Innovating with nature to address social, economic and environmental challenges. *Environmental research*, 159, 509-518.
- FAIVRE, N., SGOBBI, A., HAPPAERTS, S., RAYNAL, J. & SCHMIDT, L. 2018. Translating the Sendai Framework into action: The EU approach to ecosystem-based disaster risk reduction. *International Journal of Disaster Risk Reduction*, 32, 4-10, <https://doi.org/10.1016/j.ijdr.2017.12.015>.
- FERNANDES, P. M. 2010. Créer des forêts et des paysages résistants au feu. *Forêt méditerranéenne*, 31, 411-416.
- FERRANS, P., TORRES, M. N., TEMPRANO, J. & RODRÍGUEZ SÁNCHEZ, J. P. 2022. Sustainable Urban Drainage System (SUDS) modeling supporting decision-making: A systematic quantitative review. *Science of The Total Environment*, 806, 150447, <https://doi.org/10.1016/j.scitotenv.2021.150447>.
- FOLK, R. L. 1966. A review of grain-size parameters. *Sedimentology*, 6, 73-93.
- GANTEAUME, A., CAMIA, A., JAPPIOT, M., SAN-MIGUEL-AYANZ, J., LONG-FOURNEL, M. & LAMPIN, C. 2013. A review of the main driving factors of forest fire ignition over Europe. *Environmental management*, 51, 651-662.
- GIORDANO, R., PLUCHINOTTA, I., PAGANO, A., SCRIECIU, A. & NANU, F. 2020. Enhancing nature-based solutions acceptance through stakeholders' engagement in co-benefits identification and trade-offs analysis. *Science of The Total Environment*, 713, 136552, <https://doi.org/10.1016/j.scitotenv.2020.136552>.
- GLOBAL WATER PARTNERSHIP 2000. Integrated Water Resources Management.
- GOURLAY, M. R. 1992. Wave set-up, wave run-up and beach water table: Interaction between surf zone hydraulics and groundwater hydraulics. *Coastal engineering*, 17, 93-144.
- HAQUE, M. N., SAROAR, M., FATTAH, M. A. & MORSHED, S. R. 2022. Environmental benefits of blue ecosystem services and residents' willingness to pay in Khulna city, Bangladesh. *Heliyon*, 8, 10.1016/j.heliyon.2022.e09535.
- HELLEQUIN, A.-P., FLANQUART, H., MEUR-FEREC, C. & RULLEAU, B. 2013. Perceptions du risque de submersion marine par la population du littoral languedocien: contribution à l'analyse de la vulnérabilité côtière. *Natures Sciences Sociétés*, 21, 385-399.
- HENINE, H., CHAUMONT, C., TOURNEBIZE, J., AUGÉARD, B., KAO, C. & NEDELEC, Y. 2012. Le rôle des réseaux de drainage agricole dans le ralentissement dynamique des crues: interprétation des données de l'observatoire «Orgeval». *Sciences Eaux Territoires*, 16-23.
- HOANG, L., FENNER, R. A. & SKENDERIAN, M. 2018. A conceptual approach for evaluating the multiple benefits of urban flood management practices. *Journal of Flood Risk Management*, 11, S943-S959, <https://doi.org/10.1111/jfr3.12267>.
- JOHNSON, D. & GEISENDORF, S. 2019. Are Neighborhood-level SUDS Worth it? An Assessment of the Economic Value of Sustainable Urban Drainage System Scenarios Using Cost-Benefit

- Analyses. *Ecological Economics*, 158, 194-205,  
<https://doi.org/10.1016/j.ecolecon.2018.12.024>.
- JOINT STEERING COMMITTEE FOR WATER SENSITIVE CITIES 2009. Evaluating options for water sensitive urban design - a national guide.
- JORDA, M. & LIPPMANN-PROVANSAL, M. 1990. Terrasses de culture et bilan érosif en région méditerranéenne. Le bassin-versant du Vallat de Monsieur (Basse-Provence). *Méditerranée*, 71, 55-61.
- KUMAR, P., DEBELE, S. E., SAHANI, J., RAWAT, N., MARTI-CARDONA, B., ALFIERI, S. M., BASU, B., BASU, A. S., BOWYER, P., CHARIZOPOULOS, N., GALLOTTI, G., JAAKKO, J., LEO, L. S., LOUPIS, M., MENENTI, M., MICKOVSKI, S. B., MUN, S.-J., GONZALEZ-OLLAURI, A., PFEIFFER, J., PILLA, F., PRÖLL, J., RUTZINGER, M., SANTO, M. A., SANNIGRAHI, S., SPYROU, C., TUOMENVIRTA, H. & ZIEHER, T. 2021. Nature-based solutions efficiency evaluation against natural hazards: Modelling methods, advantages and limitations. *Science of The Total Environment*, 784, 147058, <https://doi.org/10.1016/j.scitotenv.2021.147058>.
- LABADIE, J. & CHASTEL, D. 1994. Feux de forêts et habitat: un exemple de réalisation, la protection du village de La Fare les Oliviers contre les incendies. *Forêt Méditerranéenne*, 15, 225-226.
- LÄHDE, E., KHADKA, A., TAHVONEN, O. & KOKKONEN, T. 2019. Can We Really Have It All?—Designing Multifunctionality with Sustainable Urban Drainage System Elements. *Sustainability*, 11, 1854.
- LETORTU, P., COSTA, S. & CANTAT, O. 2012. Les submersions marines en Manche orientale: approche inductive et naturaliste pour la caractérisation des facteurs responsables des inondations par la mer. *Climatologie*, 9, 31-57.
- MANGIAVILLANO, A. 2008. *Multi-scalarité du phénomène feu de forêt en régions méditerranéennes françaises de 1973 à 2006*. Université d'Avignon.
- MCVITTIE, A., COLE, L., WREFORD, A., SGOBBI, A. & YORDI, B. 2018. Ecosystem-based solutions for disaster risk reduction: Lessons from European applications of ecosystem-based adaptation measures. *International Journal of Disaster Risk Reduction*, 32, 42-54,  
<https://doi.org/10.1016/j.ijdr.2017.12.014>.
- MÖLLER, I. 2006. Quantifying saltmarsh vegetation and its effect on wave height dissipation: Results from a UK East coast saltmarsh. *Estuarine, Coastal and Shelf Science*, 69, 337-351.
- MORANDINI, R. 1979. Sylviculture et incendie. *Revue forestière française*, 31, 5-9.
- NÉDÉLEC, Y. 1999. *Activités rurales et inondations: connaissances et bonnes pratiques*, Editions Quae.
- NIKOLAIDIS, N. P., KOLOKOTSA, D. & BANWART, S. A. 2017. Nature-based solutions: business. *Nature*, 543, 315-315.
- NODIN, Y., VERAN, C. & DAVOINE, G. 2009. Valoriser les eaux pluviales en ville. *Le Moniteur des travaux publics et du bâtiment*.
- O'DONNELL, E. C., THORNE, C. R., YEAKLEY, J. A. & CHAN, F. K. S. 2020. Sustainable Flood Risk and Stormwater Management in Blue-Green Cities; an Interdisciplinary Case Study in Portland, Oregon. *JAWRA Journal of the American Water Resources Association*, 56, 757-775,  
<https://doi.org/10.1111/1752-1688.12854>.
- OSSA-MORENO, J., SMITH, K. M. & MIJIC, A. 2017. Economic analysis of wider benefits to facilitate SuDS uptake in London, UK. *Sustainable Cities and Society*, 28, 411-419,  
10.1016/j.scs.2016.10.002.
- PEUZIAT, I. I. 2005. *Plaisance et environnement. Pratiques, représentations et impacts de la fréquentation nautique de loisir dans les espaces insulaires. Le cas de l'archipel de Glénan (France)*. Université de Bretagne occidentale-Brest.
- POLETTI, R. 2014. *La résilience*, Editions Jouvence.
- POULARD, C., CHASTAN, B., ROYET, P., DEGOUTTE, G., GRELOT, F., ERDLENBRUCH, K. & NEDELEC, Y. 2008. Prévention des inondations par ralentissement dynamique: principe et recommandations. *Aspects techniques et économiques des aménagements de ralentissement dynamique des crues. Ingénieries EAT special*, 5-24.

- QI, Y., CHAN, F. K. S., THORNE, C., O'DONNELL, E., QUAGLILOLO, C., COMINO, E., PEZZOLI, A., LI, L., GRIFFITHS, J., SANG, Y. & FENG, M. 2020. Addressing Challenges of Urban Water Management in Chinese Sponge Cities via Nature-Based Solutions. *Water*, 12, 2788.
- ROOSE, E. 1996. Méthodes de mesure des états de surface du sol, de la rugosité et des autres caractéristiques qui peuvent aider au diagnostic de terrain des risques de ruissellement et d'érosion, en particulier sur les versants cultivés des montagnes. *Bull Réseau Erosion*, 16, 87-97.
- SAMAT, O. 2007. *Efficacité et impact des ouvrages en enrochement sur les plages microtidales: Le cas du languedoc et du delta du rhône*. Aix-Marseille 1.
- SAYERS, P., YUANYUAN, L., GALLOWAY, G., PENNING-ROWSELL, E., FUXIN, S., KANG, W., YIWEI, C. & QUESNE, T. L. 2013. Flood Risk Management: A Strategic Approach. Asian Development Bank, GIWP, UNESCO and WWF-UK.
- STEPHAN, C., NORF, C. & FEKETE, A. 2017. How "Sustainable" are Post-disaster Measures? Lessons to Be Learned a Decade After the 2004 Tsunami in the Indian Ocean. *International Journal of Disaster Risk Science*, 8, 33-45, 10.1007/s13753-017-0113-1.
- TEAL, J. M. & WEISHAR, L. 2005. Ecological engineering, adaptive management, and restoration management in Delaware Bay salt marsh restoration. *Ecological engineering*, 25, 304-314.
- TITKO, M. & RISTVEJ, J. 2020. Assessing Importance of Disaster Preparedness Factors for Sustainable Disaster Risk Management: The Case of the Slovak Republic. *Sustainability*, 12, 9121, 10.3390/su12219121.
- TURKELBOOM, F., DEMEYER, R., VRANKEN, L., DE BECKER, P., RAYMAEKERS, F. & DE SMET, L. 2021. How does a nature-based solution for flood control compare to a technical solution? Case study evidence from Belgium. *Ambio*, 50, 1431-1445, 10.1007/s13280-021-01548-4.
- UNESCO 2009. IWRM Guidelines at river basin level - Part I: Principles.
- VALDIEU, C. C. & OUTREQUIN, P. 2009. *L'urbanisme durable: Concevoir un écoquartier*, Le Moniteur.
- VALETTE, J.-C., RIGOLOT, E. & ETIENNE, M. 1993. Intégration des techniques de débroussaillage dans l'aménagement de défense de la forêt contre les incendies. *Forêt méditerranéenne*, 14, 141-154.
- VAN VELEN, P., VOORENDT, M. & VAN DER ZWET, C. 2015. Design challenges of multifunctional flood defences: A comparative approach to assess spatial and structural integration. *Research in Urbanism Series*, 3, 275-292, 10.7480/rius.3.841.
- VANROYE, C. & AUFFRET, C. 2010. Coût de la protection côtière en Languedoc-Roussillon: quelle rentabilité.
- VÉLEZ, R. 1990. La sylviculture préventive des incendies en Espagne. *Revue forestière française*, 42, 320-331.
- VERCRUYSSSE, K., DAWSON, D. A. & WRIGHT, N. 2019. Interoperability: A conceptual framework to bridge the gap between multifunctional and multisystem urban flood management. *Journal of Flood Risk Management*, 12, e12535, <https://doi.org/10.1111/jfr3.12535>.
- VIDAL, R. & FLEURY, A. 2009a. La cité agriurbaine, ville nature ou ville agricole? *Le développement territorial, enjeux et méthodes*, PPUR, Université de Lausanne.
- VIDAL, R. & FLEURY, A. 2009b. La place de l'agriculture dans la métropole verte. *Projets de paysage*.
- VINCENT, S. U., RADHAKRISHNAN, M., HAYDE, L. & PATHIRANA, A. 2017. Enhancing the Economic Value of Large Investments in Sustainable Drainage Systems (SuDS) through Inclusion of Ecosystems Services Benefits. *Water*, 9, 841, 10.3390/w9110841.
- VINET, F., DEFOSSEZ, S., REY, T. & BOISSIER, L. 2012. Le processus de production du risque «submersion marine» en zone littorale: l'exemple des territoires «Xynthia». *Norois. Environnement, aménagement, société*.
- VITI, M., LÖWE, R., SØRUP, H. J. D., RASMUSSEN, M., ARNBJERG-NIELSEN, K. & MCKNIGHT, U. S. 2022. Knowledge gaps and future research needs for assessing the non-market benefits of Nature-Based Solutions and Nature-Based Solution-like strategies. *Science of The Total Environment*, 841, 156636, <https://doi.org/10.1016/j.scitotenv.2022.156636>.

- WENDLING, L. A., HUOVILA, A., ZU CASTELL-RÜDENHAUSEN, M., HUKKALAINEN, M. & AIRAKSINEN, M. 2018. Benchmarking Nature-Based Solution and Smart City Assessment Schemes Against the Sustainable Development Goal Indicator Framework. *Frontiers in Environmental Science*, 6, 10.3389/fenvs.2018.00069.
- WÓJCIK-MADEJ, J. & SOWIŃSKA-ŚWIERKOSZ, B. 2022. Pre-Existing Interventions as NBS Candidates to Address Societal Challenges. *Sustainability*, 14, 9609.
- WORLD METEOROLOGICAL ORGANIZATION 2006. Environmental aspects of integrated flood management.
- WORLD METEOROLOGICAL ORGANIZATION 2009. Integrated flood Management - Concept paper.
- WORLD METEOROLOGICAL ORGANIZATION 2012. Integrated flood management tools series - Conservation and restoration of rivers and floodplains.
- WORLD METEOROLOGICAL ORGANIZATION 2013. Integrated flood management tools series - Applying environmental assessment for flood management.
- WORLD METEOROLOGICAL ORGANIZATION 2017. Selecting measures and designing strategies for integrated flood management - A guidance document.
- WORLD WILDLIFE FUND (WWF) 2016. Natural and nature-based flood management: a green guide. Washinton DC.
- WWAP/ONU-EAU 2018. Rapport mondial des Nations Unies sur la mise en valeur des ressources en eau 2018 : Les solutions fondées sur la nature pour la gestion de l'eau. Paris.
- YANG, W. & ZHANG, J. 2021. Assessing the performance of gray and green strategies for sustainable urban drainage system development: A multi-criteria decision-making analysis. *Journal of Cleaner Production*, 293, 126191, <https://doi.org/10.1016/j.jclepro.2021.126191>.



## Appendix B – Indicator grids

| Criterion           | Indicator (Code)                        | Definition – Assessment scale                                                                                                                                                                                                                                                                                                                                                                                                                                                                                                                                                                                                                                                                                                                                                                                                                            |
|---------------------|-----------------------------------------|----------------------------------------------------------------------------------------------------------------------------------------------------------------------------------------------------------------------------------------------------------------------------------------------------------------------------------------------------------------------------------------------------------------------------------------------------------------------------------------------------------------------------------------------------------------------------------------------------------------------------------------------------------------------------------------------------------------------------------------------------------------------------------------------------------------------------------------------------------|
| Multi-functionality | Multifunctional property (M1)           | <p>Ability of the RMM to fulfil other useful roles for the territory than protection against a hazard:</p> <p>+1: the RMM has a recreational role, protects the environment, maintains the landscape, and promotes the social fabric... (positive externalities)</p> <p>0: the RMM has no other role than protection against a hazard</p>                                                                                                                                                                                                                                                                                                                                                                                                                                                                                                                |
| Resilience          | Anticipation – Hazard performance (RE1) | <p>Ability of the RMM to contribute to the reduction of risk in the territory it protects, through the implementation of forecasting or prevention means:</p> <p>+1: The RMM makes a strong contribution to risk reduction, it can contribute significantly to risk reduction on its own</p> <p>0: The RMM contributes little to risk reduction and must be associated with other RMMs to contribute significantly to risk reduction</p>                                                                                                                                                                                                                                                                                                                                                                                                                 |
|                     | Recovery from shocks and events (RE2)   | <p>Ability of the RMM to be restored following the hazards:</p> <p>+1: the RMM ensures its function after the event, within a defined timeframe - for example, the RMM can be restored or rebuilt quickly and easily after the event (human, technical and financial resources), particularly in the case of repeated events</p> <p>0: the RMM ensures its function after the event, within a defined timeframe - for example, the RMM can be restored or rebuilt quickly and easily after the event (human, technical and financial resources), excluding repeated events</p> <p>-1: the RMM does not perform its function after the event, within a defined timeframe - for example, the RMM cannot be quickly and easily restored or rebuilt after the event (human, technical and financial resources), especially in the case of repeated event</p> |

| Criterion  | Indicator (Code)                                              | Definition – Assessment scale                                                                                                                                                                                                                                                                                                                                                                                                                                                                                                                                                                                     |
|------------|---------------------------------------------------------------|-------------------------------------------------------------------------------------------------------------------------------------------------------------------------------------------------------------------------------------------------------------------------------------------------------------------------------------------------------------------------------------------------------------------------------------------------------------------------------------------------------------------------------------------------------------------------------------------------------------------|
| Resilience | Preparing for change to increase risk awareness (RE3)         | <p>Ability of the RMM to affect risk awareness:</p> <p>+1: the RMM allows people to have a better awareness of risk - for example, the RMM is visible, the RMM is identified as a risk management solution</p> <p>0: the RMM does not allow people to have or improve their risk awareness - for example, the RMM is not visible, is too integrated in the landscape or is not considered a risk management solution</p>                                                                                                                                                                                          |
|            | Preparing for change towards more sustainable practices (RE4) | <p>Ability of the RMM to influence people to move toward more sustainable practices:</p> <p>+1: the RMM influences people to move toward more sustainable practices - for example, the RMM promotes people's adoption of sustainability principles (biodiversity protection, saving water, energy...)</p> <p>0: the RMM has no effect on people's sustainability practices</p> <p>-1: the RMM encourages people to move towards less sustainable practices - for example, the RMM encourages people to adopt principles that run counter to sustainability (excessive use of water for irrigation, energy...)</p> |

| <b>Criterion</b>        | <b>Indicator (Code)</b>                                             | <b>Definition – Assessment scale</b>                                                                                                                                                                                                                                                                                                                                                                                                                                                                                                                                                                                                                                                                                                                                                                                                              |
|-------------------------|---------------------------------------------------------------------|---------------------------------------------------------------------------------------------------------------------------------------------------------------------------------------------------------------------------------------------------------------------------------------------------------------------------------------------------------------------------------------------------------------------------------------------------------------------------------------------------------------------------------------------------------------------------------------------------------------------------------------------------------------------------------------------------------------------------------------------------------------------------------------------------------------------------------------------------|
| Attractiveness of place | Sense of place – Sense of identity (A1)                             | <p>Ability of the RMM to influence the sense of place or identity</p> <p>+1: the RMM strengthens the sense of place or identity. For instance, the use of particular architecture, materials (e.g., local), old or traditional know-how to build the RMM, or the presence of a RMM considered as a man-made or natural heritage can contribute to the increase and preservation of the sense of identity or to the place</p> <p>0 : the RMM have no effects on the sense of place or identity</p> <p>-1: the RMM degrades the sense of place or identity. If the RMM replaces another infrastructure or natural environment that was a marker of the place or identity</p>                                                                                                                                                                        |
|                         | Interest of citizens and other stakeholders – Use of the place (A2) | <p>Ability of the RMM to be used by a wide range of people and to foster citizen participation:</p> <p>+1: the RMM can be used by a wide range of people: different audiences can come to the site, take ownership of the site, and share different activities depending on the time of day - e.g., cultural activities, sports. Or the RMM promotes citizen participation - e.g., the public participates in the life cycle of the RMM (RMM cultivated and/or maintained voluntarily by residents)</p> <p>0: the RMM cannot be used by a wide range of people: access is restricted or forbidden and the RMM does not promote citizen participation</p> <p>-1: the RMM generates maintenance or introduction of public spaces that degrades the quality of life - for example, noise or odour nuisance, attracts pests (rats, mosquitoes...)</p> |

| Criterion       | Indicator (Code)                        | Definition – Assessment scale                                                                                                                                                                                                                                                                                                                                                                                                                                                                                                                                                                                                                                        |
|-----------------|-----------------------------------------|----------------------------------------------------------------------------------------------------------------------------------------------------------------------------------------------------------------------------------------------------------------------------------------------------------------------------------------------------------------------------------------------------------------------------------------------------------------------------------------------------------------------------------------------------------------------------------------------------------------------------------------------------------------------|
| Social cohesion | Accessibility (S1)                      | <p>Ability of the RMM to make the site accessible to all:</p> <p>+1: The RMM is accessible to all - e.g., access for people with disabilities, presence of public transportation to the site, free access</p> <p>-1: the RMM is not accessible to all - e.g., no disability access, paid access, not accessible by public transportation, not equitable access. OR the RMM is not accessible to anyone for safety reasons</p>                                                                                                                                                                                                                                        |
|                 | Social permeability (S2)                | <p>Capacity of the RMM to act on shared experiences, inter-generational, intercultural and social mixing and exchanges, citizen participation:</p> <p>+1: the RMM favours co-habitations, co-uses, co-sharing of spaces, integrative practices, citizen participation - for example, appropriation by associations, sports sessions on the site</p> <p>0: the RMM does not affect co-habitation, co-use, co-sharing of spaces, integrative practices, citizen participation</p> <p>-1: the RMM degrades co-habitation, co-use, co-sharing of spaces, integrative practices, citizen participation - for example, associations can no longer practice on the site</p> |
|                 | Equity - Reduction of inequalities (S3) | <p>Ability of the RMM to provide the same level of service to everyone:</p> <p>+1: the RMM allows populations to benefit from new facilities and helps reduce inequalities - e.g., buffer zone in which vegetable gardens are installed, green roofs</p> <p>0: The RMM does not affect the level of service</p> <p>-1: the RMM increases gaps between different strata of the population, widening the gap between disadvantaged populations and others</p>                                                                                                                                                                                                          |

| <b>Criterion</b>               | <b>Indicator (Code)</b>      | <b>Definition – Assessment scale</b>                                                                                                                                                                                                                                                                                                                                                                                                                                                      |
|--------------------------------|------------------------------|-------------------------------------------------------------------------------------------------------------------------------------------------------------------------------------------------------------------------------------------------------------------------------------------------------------------------------------------------------------------------------------------------------------------------------------------------------------------------------------------|
| Social cohesion                | Integration (S4)             | <p>Ability of the RMM to affect social integration:</p> <p>+1: the RMM promotes social integration - for example, development of jobs related to the implementation or maintenance of this type of development (services in communities)</p> <p>0: the RMM neither promotes nor hinders social integration</p> <p>-1: the RMM penalizes social integration</p>                                                                                                                            |
|                                | Social Mobility (S5)         | <p>Ability of the RMM to have an effect on social mobility</p> <p>+1: the RMM has a beneficial effect on social mobility - for example, the RMM improves the image of the neighbourhood</p> <p>0: the RMM has no effect on social mobility</p> <p>-1: the RMM has a negative effect on social mobility - for example, the RMM degrades the image of the neighbourhood</p>                                                                                                                 |
| Well-being and Quality of life | Creativity – Recreation (W1) | <p>Ability of the RMM to enable creativity and recreation and to inspire culture within the territory:</p> <p>+1: the RMM enables regeneration or generates opportunities for multiple expressions - e.g., artistic, creative and recreational practice; local practices, traditional practices</p> <p>0: the RMM does not regenerate or generate opportunities for multiple expressions - e.g., artistic, creative and recreational practice; local practices, traditional practices</p> |

| Criterion                      | Indicator (Code)          | Definition – Assessment scale                                                                                                                                                                                                                                                                                                                                                                                                                                                                                                                        |
|--------------------------------|---------------------------|------------------------------------------------------------------------------------------------------------------------------------------------------------------------------------------------------------------------------------------------------------------------------------------------------------------------------------------------------------------------------------------------------------------------------------------------------------------------------------------------------------------------------------------------------|
| Well-being and Quality of life | Education – Training (W2) | <p>Ability of the RMM to create educational and training opportunities (other than those related to risk)</p> <p>+1: the RMM generates educational, skill-building, and training opportunities (various activities including with children) outside of risk information activities - e.g., gardening, beekeeping, agricultural production, painting, photography</p> <p>0: the RMM does not generate education, skill development and training opportunities (various activities including with children) outside of risk information activities</p> |
|                                | Landscaping (W3)          | <p>Ability of the RMM to affect how the place is developed and how it can be disposed of</p> <p>+1: the RMM improves the way the place is designed and disposed of - for example, installing an RMM in a wasteland with litter</p> <p>0: the RMM does not affect the way the place is designed and disposed of</p> <p>-1: the RMM degrades the way the site is landscaped and the way it can be disposed of - for example, the RMM replaces landscaping or the RMM is visibly installed in a landscaped area, degrading its aesthetics</p>           |
|                                | Liveable city (W4)        | <p>Ability of the RMM to participate in creating a liveable city:</p> <p>+1: the RMM generates maintenance and/or introduces spaces that improve quality of life -</p> <p>0: the RMM generates maintenance and/or introduces spaces that do not impact the quality of life - or the RMM does not introduce public spaces</p> <p>-1: the RMM generates maintenance and/or introduces public spaces that degrade the quality of life</p>                                                                                                               |
|                                | Sense of security (W5)    | <p>Level of safety, excluding the natural or technological risk concerned, offered by the RMM and the place in which it is located:</p> <p>+1: the RMM and its location is a safe place to walk, a welcoming space, the surroundings are safe from accidents...</p> <p>-1: the RMM and the place where it is located is not a safe place to walk, is not a welcoming space, the surroundings are not safe from accidents...</p>                                                                                                                      |

| Criterion                    | Indicator (Code)                                                           | Definition – Assessment scale                                                                                                                                                                                                                                                                                                                                                                                                                                                                                                                                                                                                                                        |
|------------------------------|----------------------------------------------------------------------------|----------------------------------------------------------------------------------------------------------------------------------------------------------------------------------------------------------------------------------------------------------------------------------------------------------------------------------------------------------------------------------------------------------------------------------------------------------------------------------------------------------------------------------------------------------------------------------------------------------------------------------------------------------------------|
| Responsible use of resources | Improvement of land use (RU1)                                              | <p>Ability of the RMM to affect land use:</p> <p>+1: the RMM improves land use - e.g., the RMM has dual use if little space available</p> <p>0: the RMM does not affect the land use (no or reduced right-of-way) - for example, buried structure - The RMM is located on low quality soils or on a wasteland</p> <p>-1: the RMM degrades the land use (large footprint) or is located on soils with a high quality index</p>                                                                                                                                                                                                                                        |
|                              | Reduction, reuse and recycling of materials - Sustainable production (RU2) | <p>Ability of the RMM to be part of a sustainable production framework throughout its life cycle, including the transportation of the materials necessary for its construction:</p> <p>+1: during the construction of the RMM, the use of materials is reduced, or the use of recycled materials is encouraged, or its implementation allows for the reuse or recycling of its constituent materials, or the RMM is based on a policy of efficient use of energy, or the RMM is part of a sustainable management of natural resources (e.g., use of water to fight fires)</p> <p>-1: the life cycle of the RMM is not part of a sustainable production framework</p> |

| Criterion                                       | Indicator (Code)                                                                            | Definition – Assessment scale                                                                                                                                                                                                                                                                                                                                                                                                                                                                                                   |
|-------------------------------------------------|---------------------------------------------------------------------------------------------|---------------------------------------------------------------------------------------------------------------------------------------------------------------------------------------------------------------------------------------------------------------------------------------------------------------------------------------------------------------------------------------------------------------------------------------------------------------------------------------------------------------------------------|
| Preservation and improvement of the environment | Improving environmental performance (P1)                                                    | <p>Ability of the RMM to improve the environmental performance of the territory, which may aim at adaptation or mitigation of the effects of climate change:</p> <p>+1: the RMM improves environmental performance - for example, the RMM creates a cool island, or limits CO2 and greenhouse gas emissions...</p> <p>0: the RMM has no effect on environmental performance</p> <p>-1: the RMM degrades environmental performance - for example, the RMM creates a heat island or generates CO2 or greenhouse gas emissions</p> |
|                                                 | Protection, restoration and enhancement of biological diversity and ecosystem services (P2) | <p>Ability of the RMM to act on environmental protection, restoration:</p> <p>+1: the RMM increases biodiversity - e.g., the RMM renatures the site, welcoming native wild plants</p> <p>0 : the RMM preserves biodiversity - for example, the RMM maintenance plan includes treatment of invasive species</p> <p>-1: the RMM degrades biodiversity - for example, RMM destroys natural areas or native plants</p>                                                                                                              |
|                                                 | Restoration and enhancement of connectivity (P3)                                            | <p>Ability of the RMM to act on the restoration or improvement of the ecological connection</p> <p>+1: the RMM strengthens the restoration and improvement of the ecological connection. For instance, the RMM creates a green or blue belt</p> <p>0 : the RMM have no effects on the restoration and improvement of the ecological connection</p> <p>-1: the RMM degrades the restoration and improvement of the ecological connection. For instance, the RMM cut an existing green or blue belt</p>                           |



| Criterion                                       | Indicator (Code)                           | Definition – Assessment scale                                                                                                                                                                                                                                                                                                                                                                                                                                                                                                                                                                                                         |
|-------------------------------------------------|--------------------------------------------|---------------------------------------------------------------------------------------------------------------------------------------------------------------------------------------------------------------------------------------------------------------------------------------------------------------------------------------------------------------------------------------------------------------------------------------------------------------------------------------------------------------------------------------------------------------------------------------------------------------------------------------|
| Preservation and improvement of the environment | Health risks (P4)                          | <p>Ability of the RMM to have effects on the environment; the effects are expressed in the quality of water, air, soil and health</p> <p>+1: the RMM lowers health risks. For instance, the RMM performs an effective depollution of rainwater by decantation of particles; the RMM creates a cool island</p> <p>0: the RMM has no effects on health risks</p> <p>-1: the RMM strengthens health risks. For example, the RMM traps undesirable components (heavy metal, toxic residues) in playgrounds leading to possible concentration of pollutants; the RMM allows the development of undesirable fauna (mosquitoes, rats...)</p> |
| Technical specifications                        | Ease of monitoring (technical means) (T1)  | <p>Technical means necessary for the design and realization of the RMM :</p> <p>+1: the design and implementation of the RMM require minor technical means - for example, light mechanized means</p> <p>-1: the design or realization of the RMM requires important technical means - for example, heavy mechanized means</p>                                                                                                                                                                                                                                                                                                         |
|                                                 | Ease of maintenance (technical means) (T2) | <p>Technical means required for the maintenance of the RMM:</p> <p>+1: the maintenance of the RMM requires little or no technical means - for example, light mechanized means</p> <p>-1: the maintenance of the RMM requires important technical means - for example, heavy mechanized means</p>                                                                                                                                                                                                                                                                                                                                      |
|                                                 | Ease of monitoring (know-how) (T3)         | <p>Expertise required for the design and implementation of the RMM:</p> <p>+1: the design and realization of the RMM requires only one trade - for example, landscaper</p> <p>-1: the design or realization of the RMM requires several trades</p>                                                                                                                                                                                                                                                                                                                                                                                    |

| Criterion                | Indicator (Code)                    | Definition – Assessment scale                                                                                                                                                                                                                                                                                                                                                                                                            |
|--------------------------|-------------------------------------|------------------------------------------------------------------------------------------------------------------------------------------------------------------------------------------------------------------------------------------------------------------------------------------------------------------------------------------------------------------------------------------------------------------------------------------|
| Technical specifications | Ease of maintenance (know-how) (T4) | <p>Expertise required for the RMM maintenance:</p> <p>+1: the design and realization of the RMM requires only one trade - for example, landscaper</p> <p>-1: the design or realization of the RMM requires several trades</p>                                                                                                                                                                                                            |
|                          | Lifespan (T5)                       | <p>Estimate of how long the RMM can operate or be active:</p> <p>+1: the RMM has a "medium or long" life (10 years or more)</p> <p>-1: the RMM has a short lifetime (0 to 9 years)</p>                                                                                                                                                                                                                                                   |
|                          | Health and safety (T6)              | <p>Potentiality of the RMM to pose a health and safety (H &amp; S) risk to the personnel in charge of its maintenance:</p> <p>+1: the RMM is not likely to pose an H &amp; S risk to the personnel in charge of its maintenance</p> <p>-1: the RMM is likely to present an H &amp; S risk to the personnel in charge of maintenance and upkeep - for example, risk of falling, injuries, zoonosis</p>                                    |
|                          | Vandalism – Theft (T7)              | <p>Potential of the RMM to be subject to vandalism or theft:</p> <p>+1: the RMM is not very or not at all susceptible to vandalism or theft - for example, elements that cannot be dismantled or reused, protected elements or RMMs cannot be vandalized</p> <p>-1: the RMM is very sensitive to vandalism or theft - for example, elements that can be easily dismantled and reused, unprotected elements or RMMs can be vandalized</p> |
|                          | Legal constraint (T8)               | <p>Need for the RMM to meet legal or regulatory constraints or possibility of actions in the public interest for the implementation of the RMM:</p> <p>+1: the RMM does not need to meet legal or regulatory constraints</p> <p>-1: the RMM needs to meet legal or regulatory constraints - e.g., compliance with PLU, environmental protection regulations, expropriations</p>                                                          |

## Appendix C – Global scores (flood and coastal flooding hazards)

| Global Score                                                        | Classical pond | Multifunctional retention structure | Green roof - Green wall | Bioretention (rain garden) |
|---------------------------------------------------------------------|----------------|-------------------------------------|-------------------------|----------------------------|
| Without weighting                                                   | -0,03          | 0,65                                | 0,42                    | 0,69                       |
| With weighting (wAMRis=10 - wETU=5 - wCoDiBe-Env=2 - wCoDiBe-Soc=2) | 0,41           | 0,69                                | 0,32                    | 0,55                       |
| With weighting (wAMRis=10 - wETU=2 - wCoDiBe-Env=5 - wCoDiBe-Soc=5) | 0,20           | 0,82                                | 0,46                    | 0,60                       |

Table B1. Global scores (without and with criteria weighting) for flood RMMs

| Global Score                                                        | Breakwater | Artificial reef | Gabion | "Ganivelle" |
|---------------------------------------------------------------------|------------|-----------------|--------|-------------|
| Without weighting                                                   | 0,04       | 0,18            | -0,20  | 0,02        |
| With weighting (wAMRis=10 - wETU=5 - wCoDiBe-Env=2 - wCoDiBe-Soc=2) | 0,36       | 0,04            | 0,22   | 0,05        |
| With weighting (wAMRis=10 - wETU=2 - wCoDiBe-Env=5 - wCoDiBe-Soc=5) | 0,33       | 0,20            | 0,14   | -0,02       |

Table B2. Global scores (without and with criteria weighting) for coastal flooding RMMs
